# Supplementary material for: Cylindrical Micelles by the Self-Assembly of Crystalline-b-Coil Polyphosphazene-b-P2VP Block Copolymers. Stabilization of Gold Nanoparticles
Source: PubMed Central journal article supplement (PMC6539542; doi:10.3390/molecules24091772), 2019-05-07
Supplement: molecules-24-01772-s001.pdf [file molecules-24-01772-s001.pdf]

**Supporting Informatio for**

## **Cylindrical Micelles by the Self-Assembly of Crystalline-b-Coil Polyphosphazene-b-P2VP Block Copolymers. Stabilization of Gold Nanoparticles**

**Maria de los Angeles Cortes <sup>1</sup>, Raquel de la Campa <sup>2</sup>, Maria Luisa Valenzuela <sup>3</sup>, Carlos Díaz <sup>1</sup>, Gabino A. Carriedo <sup>2</sup> and Alejandro Presa Soto <sup>2,\*</sup>**

<sup>1</sup> Department of Chemistry, School of Chemistry, University of Chile, La Palmeras, 3425, Nuñoa, Casilla 653, 7800003 Santiago de Chile, Chile; mariadelosangeles.cortesc@gmail.com (M.d.l.A.C.); cdiaz@uchile.cl (C.D.)

<sup>2</sup> Department of Organic and Inorganic Chemistry (IUQOEM), School of Chemistry, University of Oviedo, Julián Clavería s/n, 33006 Oviedo, Spain; delacampafernandez@yahoo.es (R.d.l.C.); gac@uniovi.es (G.A.C.)

<sup>3</sup> University Autónoma de Chile, School of Engineering, Institute of Applied Chemistry Science, Inorganic Chemistry and Molecular Material Center, Av. El Llano Subercaseaux, 2801, 8900000 Santiago de Chile, Chile; maria.valenzuela@uautonoma.cl (M.L.V)

\* Correspondence: presaalejandro@uniovi.es (A.P.S.); Tel: +34-985-10-2986

1. NMR spectra of P2VP-PPh<sub>2</sub> (4)

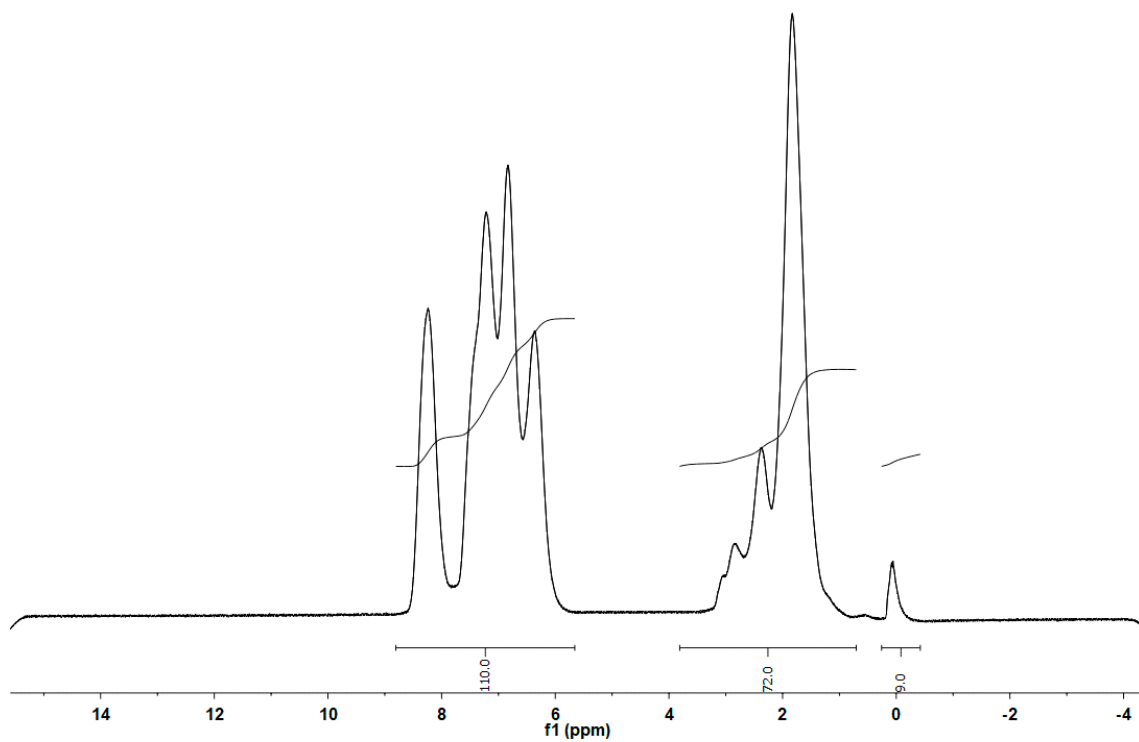

Figure S1. <sup>1</sup>H-NMR (CDCl<sub>3</sub>)

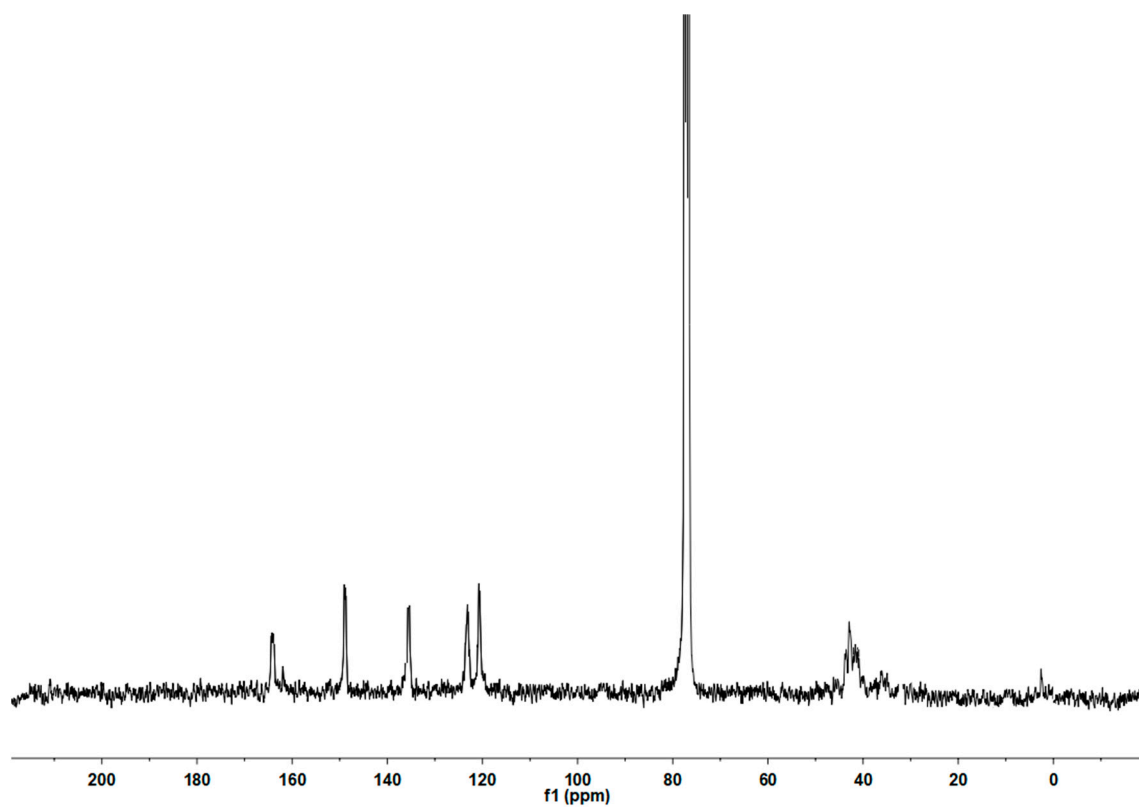

Figure S2. <sup>13</sup>C-<sup>1</sup>H-NMR (CDCl<sub>3</sub>)

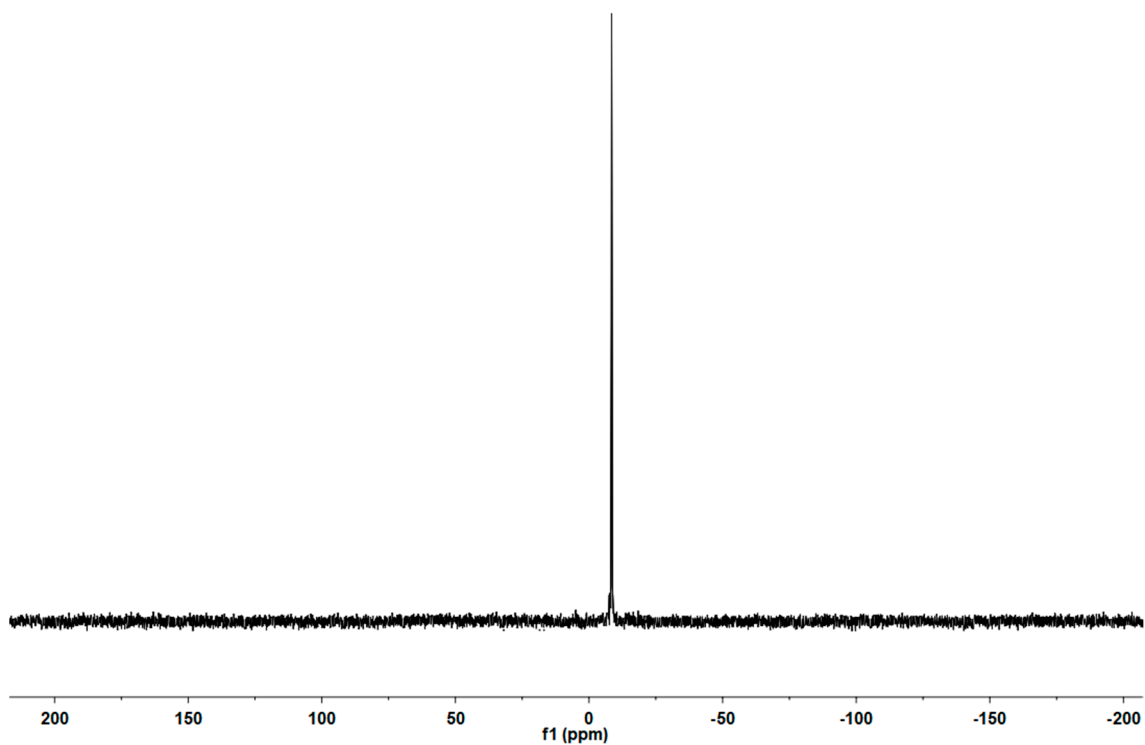

Figure S3.  $^{31}\text{P}$ - $\{^1\text{H}\}$ -NMR ( $\text{CDCl}_3$ )

2. NMR spectra of P2VP-PPH<sub>2</sub>Cl<sub>2</sub> (5)

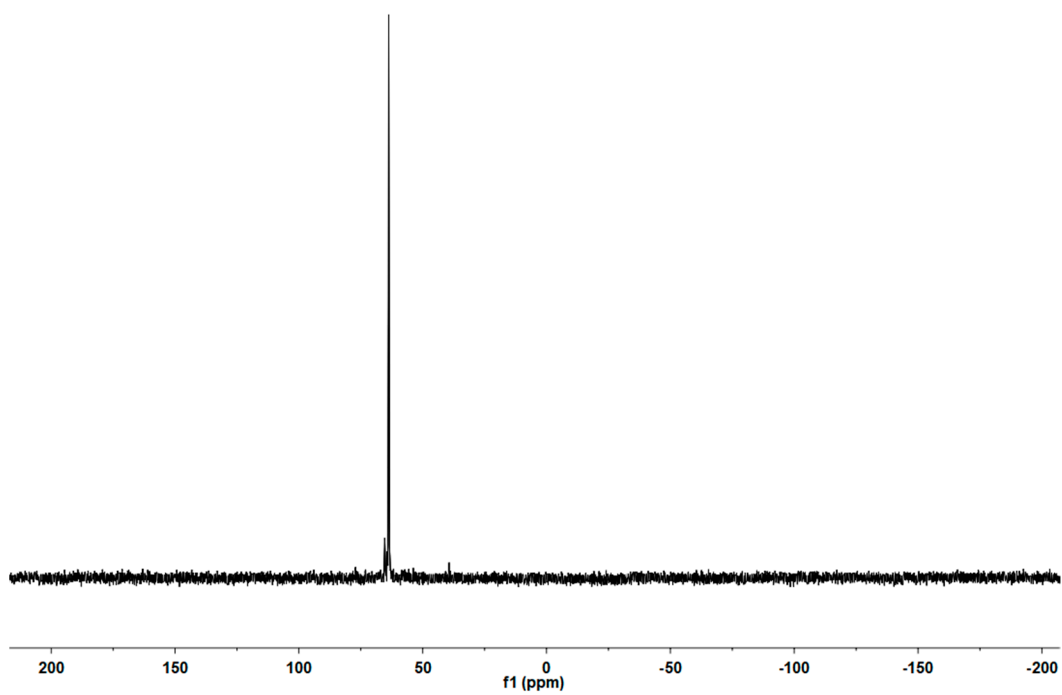

Figure S4.  $^{31}\text{P}$ - $\{^1\text{H}\}$ -NMR ( $\text{CH}_2\text{Cl}_2$  with external reference of  $\text{D}_2\text{O}$ )

### 3. NMR spectra of PTFEP-*b*-P2VP (**8a**)

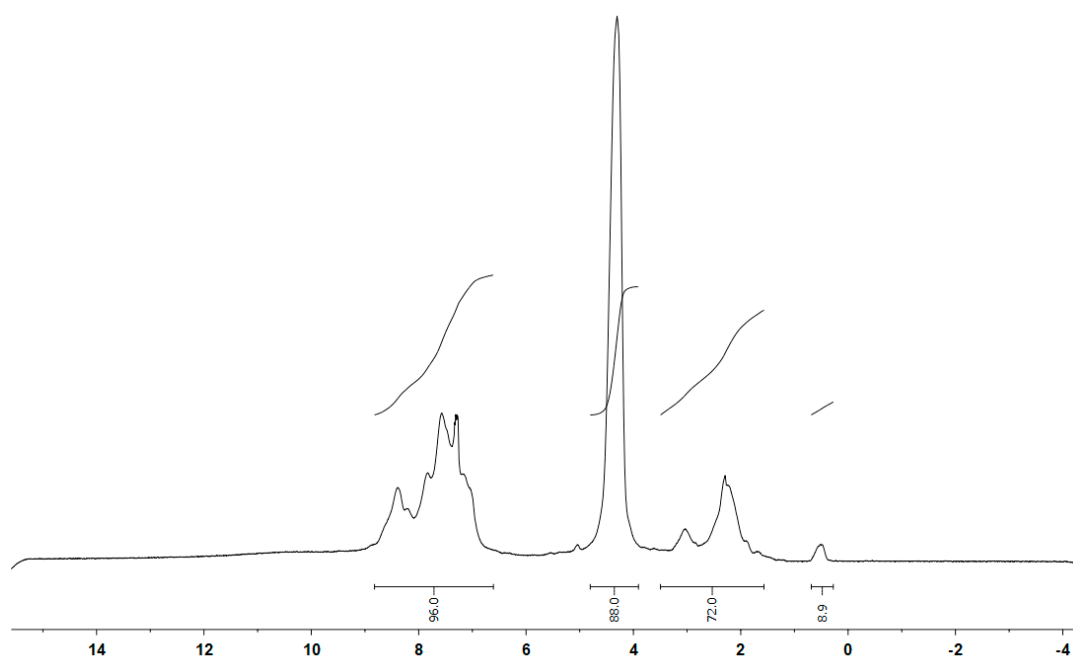

Figure S5.  $^1\text{H}$ -NMR ( $\text{CDCl}_3$ )

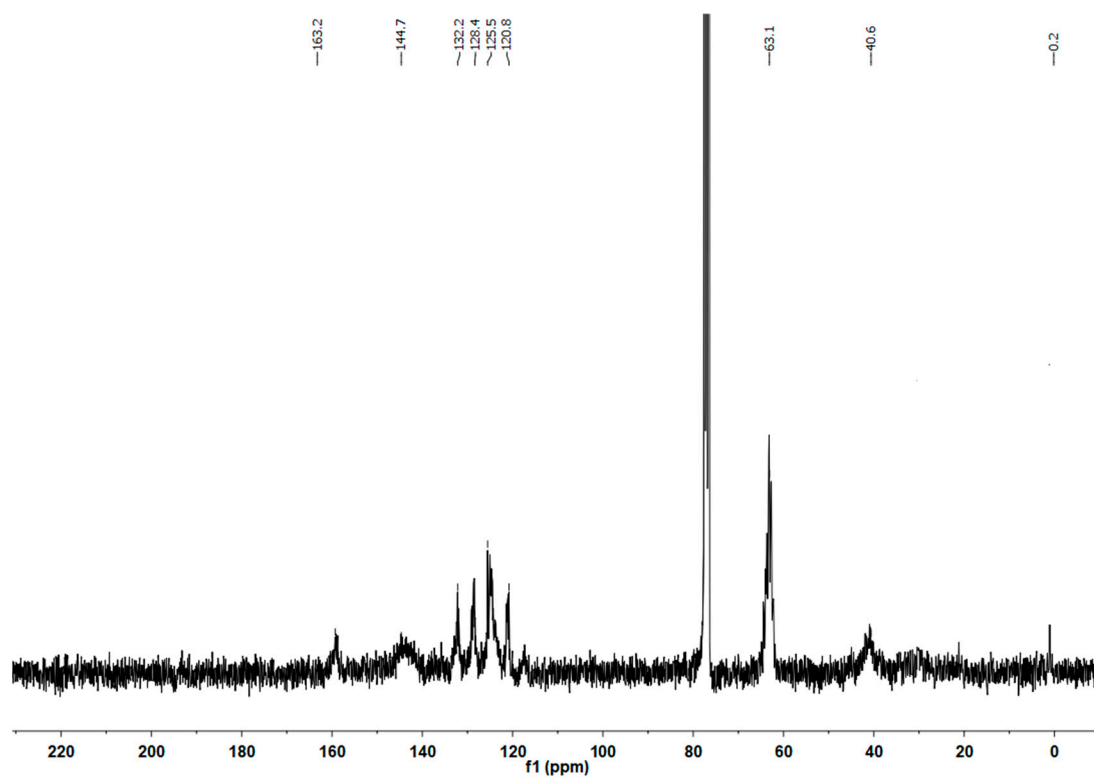

Figure S6.  $^{13}\text{C}$ - $\{^1\text{H}\}$ -NMR ( $\text{CDCl}_3$ )

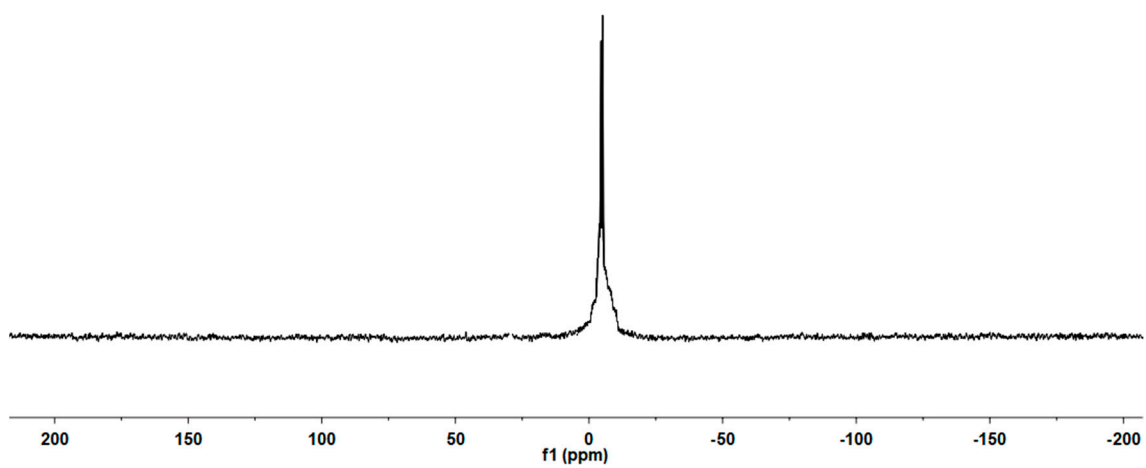

Figure S7.  $^{31}\text{P}$ - $\{^1\text{H}\}$ -NMR ( $\text{CDCl}_3$ )

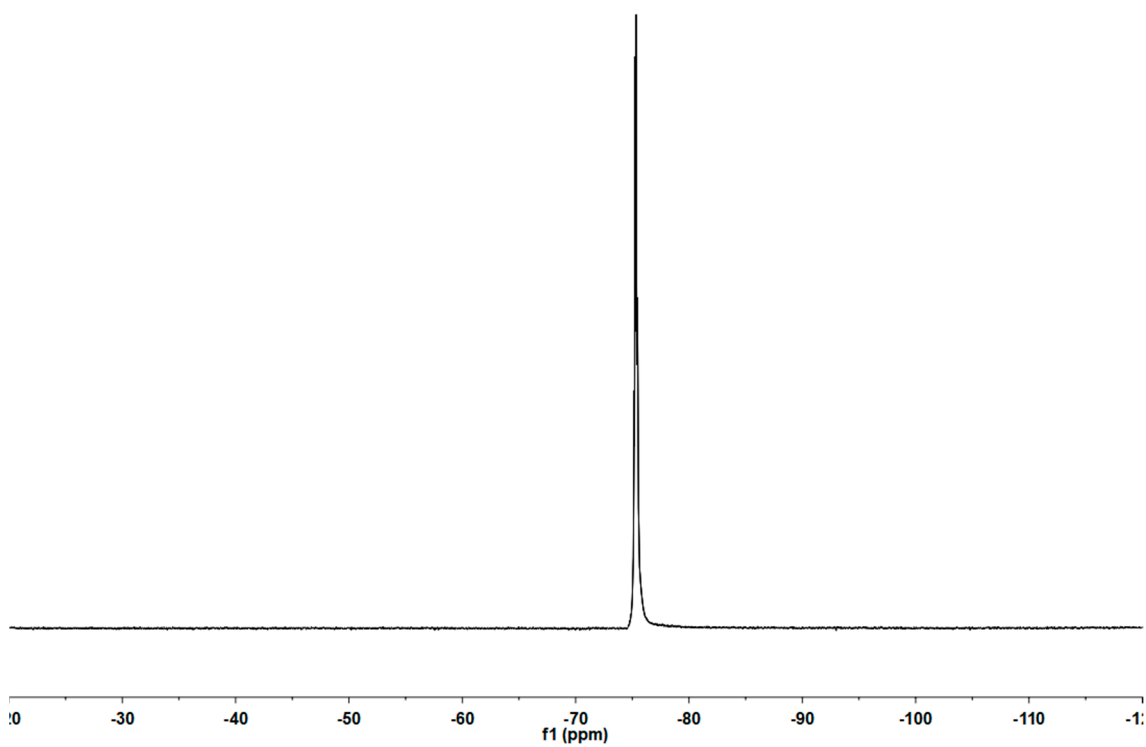

Figure S8.  $^{19}\text{F}$ - $\{^1\text{H}\}$ -NMR ( $\text{CDCl}_3$ )

4. DLS data of the self-assembly studies of PTFEP-*b*-P2VP (**8a-c**)

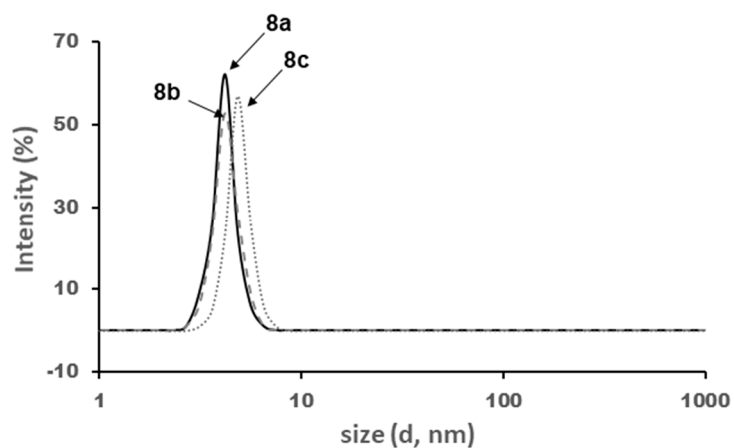

**Figure S9.** DLS of BCPs **8a-c** in THF at 0.5 mg/mL

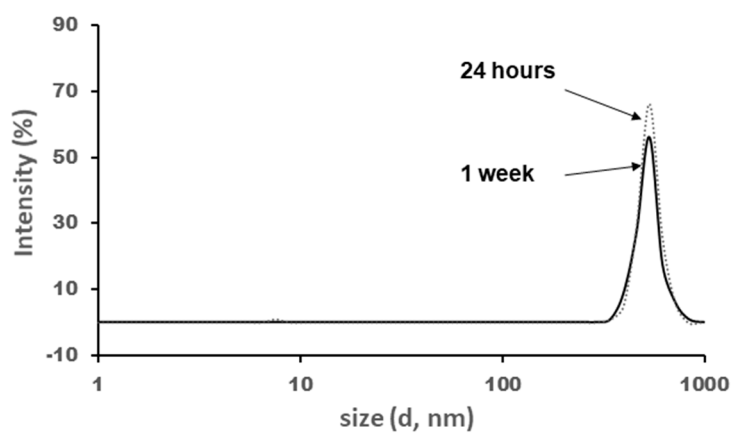

**Figure S10.** DLS of a solution of BCP **8a** at different times (24 h and 1 week) after the addition of 50 % vol. of 2-propanol over a 0.5 mg/mL THF solution of **8a** (addition rate = 1 drop / 5 sec).

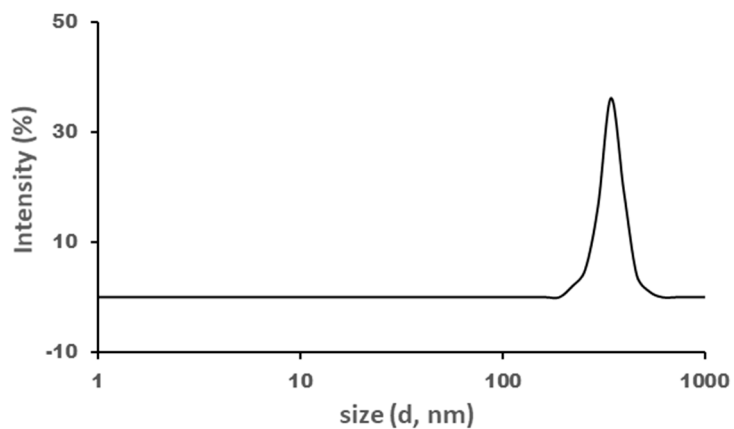

**Figure S11.** DLS of a solution of BCP **8a** after the addition of 100 % vol. of 2-propanol over a 0.5 mg/mL THF solution of **8a** (addition rate = 1 drop / 5 sec).

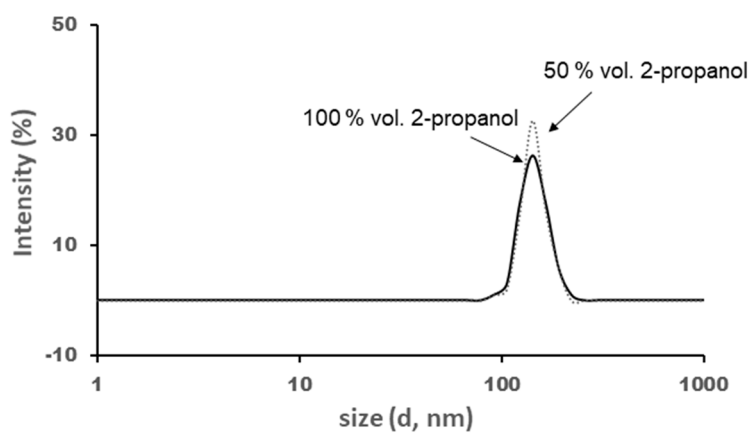

**Figure S12.** DLS of solutions of BCP **8a** after the addition of 50 and 100 % vol. of 2-propanol over a 0.5 mg/mL THF solution of **8a** (addition rate = 1 step).
